# 1 Age variability and time averaging in oyster reef death

## 2 assemblages

3 **Stephen R. Durham<sup>1</sup>, Gregory P. Dietl<sup>2,3</sup>, Quan Hua<sup>4</sup>, John C. Handley<sup>2,5</sup>, Darrell**

4 **Kaufman<sup>6</sup> and Cheryl P. Clark<sup>1</sup>**

5 *<sup>1</sup>Florida Department of Environmental Protection, 2600 Blair Stone Road, MS 235, Tallahassee,*

6 *FL, USA 32399*

7 *<sup>2</sup>Paleontological Research Institution, Ithaca, NY, USA 14850*

8 *<sup>3</sup>Department of Earth and Atmospheric Sciences, Cornell University, Ithaca, NY, USA 14853*

9 *<sup>4</sup>Australian Nuclear Science and Technology Organisation, Locked Bag 2001, Kirrawee DC,*

10 *NSW, Australia 2232*

11 *<sup>5</sup>Simon School of Business, University of Rochester, Rochester, NY, USA 14627*

12 *<sup>6</sup>School of Earth and Sustainability, Northern Arizona University, Flagstaff, AZ, USA 86011*

13

### 14 **ABSTRACT**

15 A lack of temporal context for paleoecological data from molluscan death assemblages

16 (DAs) makes integrating them with monitoring data from living communities to inform habitat

17 management difficult. Here we illustrate this challenge by documenting the spatial and

18 stratigraphic variability in age and time-averaging of oyster reef death assemblages. We

19 radiocarbon dated a total of 573 oyster shells from samples of two burial depths on 28 oyster

20 reefs around Florida and found 1) that spatial and stratigraphic variability in DA sample ages and

21 time-averaging are of similar magnitude, and 2) that the shallow oyster reef DAs are among the

22 youngest and highest-resolution molluscan DAs documented to-date, with most having time-

23 averaging estimates of decades or less. This information increases the potential usefulness of the  
24 DAs for habitat management because measured indicators can be placed in temporal context  
25 relative to monitoring data. More broadly, the results highlight the potential to obtain decadal-  
26 scale resolution from oyster bioherms in the fossil record.

27

## 28 **INTRODUCTION**

29 Decades of work on death assemblages (DAs) have successfully documented temporal  
30 changes in community composition or species attributes over time from direct assessments of the  
31 remains themselves (e.g., Kowalewski et al., 2000; Kidwell, 2007; Dietl and Durham, 2016;  
32 Albano et al., 2021), or proxy information derived from them (e.g., Gillikin et al., 2019). Despite  
33 the promise of these geohistorical records for conservation paleobiology, examples of their use  
34 by resource managers are still uncommon. One reason is the difficulty of putting DA data in  
35 temporal context. Geochronological analyses (e.g., radiocarbon dating) are expensive and  
36 difficult to interpret, leading many conservation paleobiological studies to either work around  
37 age-related uncertainties by citing general assumptions and/or studies from similar depositional  
38 settings (e.g., Dietl and Durham, 2016).

39 However, assemblage- or specimen-level chronological control is often required to  
40 meaningfully compare DA data with the annual or sub-annual real-time monitoring data typically  
41 used for resource management. This was the case for a project that was co-developed by the  
42 Florida Department of Environmental Protection (FDEP) Office of Resilience and Coastal  
43 Protection (ORCP) and the Paleontological Research Institution (PRI) where DA samples from  
44 oyster reefs were used to address a need for additional historical body size data on oyster  
45 populations for ORCP's Statewide Ecosystem Assessment of Coastal and Aquatic Resources

46 (SEACAR) project<sup>1</sup>.

47           Habitat management within the aquatic preserves managed by ORCP is conducted  
48 mainly with reference to conditions at the times they were established, which range from 1966 to  
49 2020, meaning the ultimate utility of the DA approach to supplementing monitoring data for  
50 SEACAR depended on the specific age and time-averaging properties of the oyster reef DAs.  
51 We hypothesized that oyster reef structure might limit post-burial stratigraphic mixing enough  
52 that samples from the DAs could yield data at a high-enough temporal resolution to be integrated  
53 with real-time monitoring data from living oyster populations. To test this assumption and  
54 develop an understanding of both oyster reef taphonomy and the potential utility of DA data for  
55 FDEP, we produced a geochronological dataset to quantify the absolute ages and temporal  
56 resolutions of oyster reef DAs from around the state.

57           Here we describe this investigation and show that oyster reef DAs preserve reliably  
58 recent and high-resolution stratigraphic records relative to most other molluscan DAs  
59 documented to-date. The oyster reef DAs also had some of the lowest estimated scales of time-  
60 averaging of any molluscan DA, suggesting these records are often appropriate for decadal-scale  
61 conservation paleobiological investigations. We also highlight the geographic variability in our  
62 dataset and its implications for the importance of location-specific geochronological information  
63 for increasing the salience of paleoecological data for the resource management community.

64

## 65 **MATERIAL AND METHODS**

66           In order to build a geochronological dataset to evaluate the utility of oyster DA samples  
67 for documenting trends over recent decades, a total of 573 *C. virginica* left valve specimens was

---

<sup>1</sup> [www.floridadep.gov/SEACAR](http://www.floridadep.gov/SEACAR)

68 randomly selected from oyster DA samples representing two stratigraphic intervals (15-25 cm  
69 and 25-35 cm) from up to three sample holes at each of 28 oyster reefs in 10 locations around  
70 Florida, i.e., between 2 and 7 specimens from each DA sample (Fig. 1). The selected specimens<sup>2</sup>  
71 were dated by radiocarbon analysis of powdered carbonate targets (Bush et al., 2013; Hua et al.,  
72 2019)—a less expensive method with lower precision than the standard analysis of graphite  
73 targets, but which yields similar ages (Bright et al., 2021)—to achieve a higher sample size.  
74 Specimens were prepared at Northern Arizona University and analyzed at the W.M. Keck  
75 Carbon Cycle Accelerator Mass Spectrometry facility at the University of California, Irvine.  
76 Local corrections for the hardwater effect (e.g., Spennemann and Head, 1998) and/or estuarine  
77 influences (e.g., Ulm et al., 2009), in terms of dead carbon contribution, were developed using  
78 additional radiocarbon analyses of 1-2 live-caught oyster specimens from each sampling area  
79 (Supplementary Information).

80 Age calibration was performed using OxCal v4.4 software (Bronk Ramsey, 2009), and  
81 the Marine20 calibration curve (Heaton et al., 2020) with a constant regional marine reservoir  
82 correction— $\Delta R = -134 \pm 26$  years, which is equivalent to  $5 \pm 32$  years (Kowalewski et al., 2018)  
83 relative to Marine13 (Reimer et al., 2013)—extended to 2019 using an updated version of the  
84 regional marine bomb radiocarbon data presented in Kowalewski et al. (2018) (Supplementary  
85 Information). Following Kowalewski et al. (2018), we used empirical posterior distributions of

---

<sup>2</sup> See Durham et al. (2019) for DA sample collection and processing information and  
Supplementary Information for details on specimen selection for radiocarbon analysis.

86 age probabilities for the specimens in each DA sample to estimate 1) DA sample age<sup>3</sup> as the  
87 median of the specimen ages weighted by their probabilities, 2) the total age variability in the  
88 DA sample as the interquartile range of the specimen ages weighted by their probabilities  
89 ( $IQR_{TAV}$ ) and 3) the age-estimation error for individual specimens in the DA sample as the  
90 median of the interquartile ranges of the specimen ages, weighted by their probabilities. The  
91 difference between the  $IQR_{TAV}$  and the specimen age estimation error for a given DA sample—  
92 i.e., the corrected posterior age estimate (CPE, *sensu* Kowalewski et al., 2018; also known as  
93 residual time averaging in some studies)—is an estimate of the time averaging in the sample,  
94 accounting for specimen age estimation error.

95 To compare the contributions of location and burial depth to overall variation in DA  
96 sample median age and CPE, we fit a hierarchical Bayesian model to the data for each burial  
97 depth as well as the burial depth difference for each DA sample hole (Supplementary  
98 Information). All data analyses were conducted using R statistical software v4.1.1 (R Core  
99 Team, 2021) in the RStudio integrated development environment (RStudio Team, 2021).

100

## 101 **RESULTS**

102 The radiocarbon results indicated that oyster reef DAs are high-resolution archives with  
103 abundant shells from the recent past and minimal time-averaging. Among the 114 dated oyster  
104 DA samples, median calibrated ages ranged from 1622 to 2014, but 93.9 % were post-1950 (Fig.  
105 2), and 53.5 % of the DA samples had sub-decadal-scale CPE (0-10 years), 36.8 % had decadal-

---

<sup>3</sup> We use the terms “specimen age” and “sample age” to refer to radiocarbon results for an individual oyster shell and all oyster shells from a given DA sample, respectively.

106 scale CPE (11-100 years), and 9.6 % had centennial-scale CPE (101-1000 years) (Fig. 3; see  
107 Appendix DR1 for DA sample-level results). Moreover, co-located samples from different burial  
108 depths showed the expected temporal order (i.e., deeper = older) in most cases: out of the 49  
109 sample holes for which both depth intervals were processed and dated, 10 had median DA  
110 sample ages for the 15-25 cm burial depth that were older than those of the 25-35 cm burial  
111 depth material, and six of those cases were from a single locality (Fig. 2). The results also  
112 showed that the age and time-averaging of a given burial depth can vary substantially over small  
113 spatial scales (i.e., both intra- and inter-reef assemblage variation; Fig. 2). In fact, the modeled  
114 standard deviations (SD) for spatial variability in median age and CPE (e.g., 53.1 and 53.9 years  
115 for the 15-25cm depth, DA sample-hole-level median SDs for median age and CPE,  
116 respectively) were of similar magnitude to those for the difference between burial depths (e.g.,  
117 58.1 and 96.2 years for the DA sample-hole-level median depth differences SDs for median age  
118 and CPE, respectively; Table DR4, Figures DR2 to DR7).

119

## 120 **DISCUSSION**

121 To our knowledge, this is the largest study of age-depth relationships, and the first to  
122 document time-averaging, in oyster reef DAs. We found that relative to other molluscan DAs,  
123 the oyster DA samples were younger, less time-averaged, and had less spatial variability in both  
124 calibrated age and time-averaging estimates (Flessa et al., 1993; Meldahl et al., 1997;  
125 Kowalewski et al., 1998, 2018; Kosnik et al., 2009, 2015; Krause et al., 2010; Dexter et al.,  
126 2014; Dominguez et al., 2016; Ritter et al., 2017; Tomašových et al., 2019; Albano et al., 2020;  
127 see additional studies summarized in Table 1 of Kidwell, 2013; but see also Tomašových et al.,  
128 2018 for an example of a non-reef DA with decadal-scale resolution).

129           Among the few recent studies that have used similar methods to quantify scales of time-  
130 averaging, the *C. virginica* DA samples typically had younger median ages by about 100 years  
131 and over half of our samples also had lower CPE, some by an order of magnitude or more (Fig.  
132 3). For instance, Dominguez et al. (2016) sampled the upper 20 cm of sediment at six sites with  
133 ~9 m water depth in Sydney Harbour, Australia and found decadal scales of time averaging  
134 (~20-40 years) in DAs of the bivalve *Fulvia tenuicostata*, but the median ages of the samples  
135 were ~150 years. In contrast, median CPE across all of the *C. virginica* DA samples in our study  
136 was ~9 years (ranging from zero to 360 years) and the medians of the median calibrated ages  
137 across all of the 15-25 cm and 25-35 cm burial depth DA samples were 22 years and 33 years,  
138 respectively. The SDs for both median age and CPE among the locations sampled by Dominguez  
139 et al. (2016) were both higher than the respective modeled locality-level SDs for the oyster reefs  
140 we sampled, despite the much greater geographic area covered by our study (Table DR3, Figures  
141 DR2 to DR7).

142           One exception to this pattern is Tomašových et al. (2018), who found comparable age  
143 and time-averaging estimates to ours in *Corbula gibba* DAs from cores of the Po and Isonzo  
144 prodeltas (Fig. 3). However, the authors stated that the two deltas have some of the highest  
145 sedimentation rates in the northern Adriatic Sea, and median ages and time-averaging estimates  
146 for *C. gibba* DAs from the eastern Gulf of Trieste—across the Gulf from the Isonzo River and  
147 characterized by low sedimentation rates—were older and more time-averaged than the prodelta  
148 samples by nearly two orders of magnitude (Tomašových et al., 2019). This large difference  
149 between the two depositional settings suggests that high resolution is not a general characteristic  
150 of *C. gibba* DAs in the region. In contrast, decadal-scale resolution appears to be a common  
151 feature of DAs from intertidal *C. virginica* reefs in multiple estuaries across Florida.

152 Overall, our results suggest oyster reefs have a relatively high shell burial rate and less  
153 stratigraphic mixing relative to non-reef molluscan DAs, supporting the hypothesis that the  
154 physical structure of oyster reefs limits their DAs' susceptibility to some taphonomic processes.  
155 Despite their higher temporal resolution than other types of molluscan DAs, however,  
156 considerable geographic variation, and even intra-assemblage variation, was still present in the  
157 oyster DA median ages and CPE (Fig. 2), precluding useful generalizations of the results into  
158 regional or statewide guidance on age vs. burial depth relationships or scales of time-averaging  
159 (see Supplementary Information for an example).

160 This variability illustrates why specific geochronological information will be important  
161 for many conservation paleobiological contributions to oyster management. Exactly how  
162 necessary they are for any given project will depend on the questions being investigated, but  
163 trends in many indicators of oyster population condition, such as live oyster size-frequency, are  
164 typically tracked at annual or sub-annual intervals by oyster monitoring programs. To integrate  
165 measurements from DA samples with such high-resolution records for trend analyses, it will  
166 likely be necessary to know, for instance, whether the median calibrated age and CPE of a DA  
167 sample are 2002 and 9.25 years, respectively, or 1986 and 41.75 years—as was the case for two  
168 of the 15-25cm burial depth DA samples from our Little St. George Island locality.

169 Once these data are obtained and DA sample ages and time-averaging can be estimated,  
170 however, more confident comparisons between the DA data and monitoring data become  
171 possible, such as integrating DA and real-time data into a single model that accounts for  
172 uncertainty in sample ages, instead of only focusing on more general “before/after” comparisons  
173 (e.g., Dietl and Durham, 2016). Specifically, the limited time-averaging and recent median ages  
174 make these oyster DA samples a promising resource for decadal-scale historical oyster



175 information for the ORCP SEACAR project. Most of the DA samples represent a relevant time  
176 period for management and could yield historical oyster population data for ORCP managed  
177 areas that are not otherwise accessible, given the lack of long-term oyster monitoring records  
178 from most coastal areas of the state.

179         Lastly, given the apparently limited stratigraphic mobility of shells preserved within  
180 Recent oyster DAs and the fact that oyster reefs are sometimes preserved in the fossil record as  
181 *in situ* bioherms, our study results suggest the intriguing possibility that the degree of time-  
182 averaging in a fossil bioherm is not dramatically greater than in the DA of a living oyster reef. If  
183 this is the case, bioherms may preserve decadal-scale records from time-periods when  
184 information at such a fine temporal resolution is exceptionally rare, making them potentially  
185 valuable records for studies of short-term ecological processes in the deep past that are not  
186 possible with other fossil assemblages (e.g., Kowalewski et al., 1998; Kidwell and Tomasovych,  
187 2013).

188

## 189 **ACKNOWLEDGMENTS**

190 We thank Jordon Bright (Amino Acid Geochronology Lab, Northern Arizona University) and  
191 the Keck AMS lab (University of California, Irvine) for <sup>14</sup>C analyses, and Matthew Kosnik  
192 (Macquarie University) for help adapting the Kowalewski et al. (2018) R script. We also thank  
193 colleagues and volunteers from FDEP, PRI, and Florida Department of Agriculture and  
194 Consumer Services (FDACS) who helped with field or lab work (\*FDEP, †PRI, ‡FDACS,  
195 •Pelican Island National Wildlife Refuge). Staff: M. Anderson\*, P. Benjasirichai‡, E. Bourque\*,  
196 M. Brown\*, C. Brunk\*, C. Clark‡, S. Cofone‡, R. Cray\*, E. Dark\*, M. DeHaven‡, N. Dix\*, S.  
197 Erickson\*, J. Fleiger‡, J. Garwood\*, T. Green\*, B. Hamill\*, K. Harshaw‡, D. Hersl\*, T. Jones\*, K.

198 Lang<sup>\*</sup>, P. Marcum<sup>\*</sup>, M. McMurray<sup>\*</sup>, B. Mowbray<sup>\*</sup>, R. Noyes<sup>\*</sup>, J. Pier<sup>†</sup>, R. Prado<sup>\*</sup>, M. Pruden<sup>†</sup>;  
199 Volunteers: B. Alexander<sup>\*</sup>, A. Bishop<sup>\*</sup>, S. Gavirneni<sup>†</sup>, C. Hormuth<sup>\*</sup>, A. McNeil<sup>†</sup>, M. Melekos<sup>†</sup>,  
200 R. Mondazzi<sup>\*</sup>, D. Philipp<sup>\*</sup>, E. Prest<sup>†</sup>, M. Raymond<sup>\*</sup>, M. Schilling<sup>\*</sup>, Z. Siper<sup>†</sup>, B. Skoblick<sup>†</sup>, A.  
201 Thorsness<sup>\*</sup>, D. Thorsness<sup>\*</sup>, J. Valentine<sup>\*</sup>. We also gratefully acknowledge funding from the  
202 National Oceanic and Atmospheric Administration (NOAA) Office for Coastal Management  
203 under the Coastal Zone Management Act of 1972, as amended, to the Florida Coastal  
204 Management Program (NOAA awards NA18NOS4190080 and NA19NOS4190064). The views,  
205 statements, findings, conclusions and recommendations expressed herein are those of the  
206 author(s) and do not necessarily reflect the views of the State of Florida, NOAA or any of their  
207 subagencies.

208 FIGURE CAPTIONS

209

210 Figure 1. Map showing the 10 localities in Florida where oyster reef DAs were sampled (yellow  
211 circles). FDEP ORCP = Florida Department of Environmental Protection Office of Resilience  
212 and Coastal Protection.

213

214 Figure 2. Plot showing the median ages of the oyster DA samples by reef and locality relative to  
215 2019. Note that the x-axis is on the  $\log_{10}$  scale. Error bars represent the corrected posterior age  
216 estimate for each bulk sample. Localities are listed on the y axis in counter-clockwise geographic  
217 order around the state, starting at the panhandle: LSG = Little St. George Island, GI-EC = Goose  
218 Island/East Cove, LC = Lone Cabbage, HC-MC = Hendry Creek/Mullock Creek, NP = New  
219 Pass, BH = Big Hickory, JI = Jack Island, PC = Pellicer Creek, MR = Matanzas River, GR =  
220 Guana River.

221

222 Figure 3. Plot of median ages (relative to collection year) against corrected posterior age  
223 estimates for some comparable recent studies of molluscan DAs. The *C. virginica* DA samples  
224 are consistently younger and, in many cases, less time-averaged than other studied DAs. Thin  
225 brown and blue vertical lines show the medians of the median ages from this study for the DA  
226 samples from 15-25 cm and 25-35 cm burial depths, respectively. Note the y-axis is shown on  
227 the  $\log_{10}$  scale.

## 228 REFERENCES

- 229 Albano, P.G., Hua, Q., Kaufman, D.S., Tomašových, A., Zuschin, M., and Agiadi, K., 2020,  
230 Radiocarbon dating supports bivalve-fish age coupling along a bathymetric gradient in  
231 high-resolution paleoenvironmental studies: *Geology*, v. 48, p. 589–593,  
232 doi:10.1130/G47210.1.
- 233 Albano, P.G., Steger, J., Bošnjak, M., Dunne, B., Guifarro, Z., Turapova, E., Hua, Q., Kaufman,  
234 D.S., Rilov, G., and Zuschin, M., 2021, Native biodiversity collapse in the eastern  
235 Mediterranean: *Proceedings of the Royal Society B: Biological Sciences*, v. 288, p.  
236 20202469, doi:10.1098/rspb.2020.2469.
- 237 Bright, J., Kaufman, D.S., Whitacre, K., Ebert, C., Southon, J.R., Albano, P., Flores, C., Frazer,  
238 T.K., Hau, Q., Kosnik, M.A., Kowalewski, M., Martinelli, J.D., Oakley, D., Parker,  
239 W.G., Retelle, M., Ritter, M.N., Rivadeneria, M.M., Scarponi, D., Yanes, Y., and  
240 Zuschin, M., 2021, Comparing rapid and standard <sup>14</sup>C ages from an assortment of  
241 biogenic carbonates: *Radiocarbon*, v. 63, p. 387-403. doi: 10.1017/RDC.2020.131
- 242 Bronk Ramsey, C., 2009, Bayesian analysis of radiocarbon dates: *Radiocarbon*, v. 51, p. 337–  
243 360, doi:10.1017/S0033822200033865.
- 244 Bush, S.L., Santos, G.M., Xu, X., Southon, J.R., Thiagarajan, N., Hines, S.K., and Adkins, J.F.,  
245 2013, Simple, rapid, and cost effective: a screening method for 14 C analysis of small  
246 carbonate samples: *Radiocarbon*, v. 55, p. 631–640, doi:10.1017/S0033822200057787.
- 247 Dexter, T.A., Kaufman, D.S., Krause, R.A., Barbour Wood, S.L., Simões, M.G., Huntley, J.W.,  
248 Yanes, Y., Romanek, C.S., and Kowalewski, M., 2014, A continuous multi-millennial  
249 record of surficial bivalve mollusk shells from the São Paulo Bight, Brazilian shelf:  
250 *Quaternary Research*, v. 81, p. 274–283, doi:10.1016/j.yqres.2013.12.007.
- 251 Dietl, G.P., and Durham, S.R., 2016, Geohistorical records indicate no impact of the Deepwater  
252 Horizon oil spill on oyster body size: *Royal Society Open Science*, v. 3, p. 160763,  
253 doi:10.1098/rsos.160763.
- 254 Dominguez, J.G., Kosnik, M.A., Allen, A.P., Hua, Q., Jacob, D.E., Kaufman, D.S., and  
255 Whitacre, K., 2016, Time-averaging and stratigraphic resolution in death assemblages  
256 and holocene deposits: Sydney Harbour’s molluscan record: *PALAIOS*, v. 31, p. 563–  
257 574, doi:10.2110/palo.2015.087.
- 258 Durham, S.R., Dietl, G.P., and Clark, C.P., 2019, Historical oyster body size project: sample  
259 collection, sample processing and data collection protocol: *Florida Coastal Management*  
260 *Program v. 3.1*, 22 p., <https://dev.seacar.waterinstitute.usf.edu/programs/details/5035>  
261 (accessed September 2021).
- 262 Flessa, K.W., Cutler, A.H., and Meldahl, K.H., 1993, Time and taphonomy: quantitative  
263 estimates of time-averaging and stratigraphic disorder in a shallow marine habitat:  
264 *Paleobiology*, v. 19, p. 266–286, doi:10.1017/S0094837300015918.

- 265 Gillikin, D.P., Wanamaker, A.D., and Andrus, C.F.T., 2019, Chemical sclerochronology:  
266 Chemical Geology, v. 526, p. 1–6, doi:10.1016/j.chemgeo.2019.06.016.
- 267 Heaton, T.J. et al., 2020, Marine20 - the marine radiocarbon age calibration curve (0–55,000 cal  
268 BP): Radiocarbon, v. 62, p. 779–820, doi:10.1017/RDC.2020.68.
- 269 Hua, Q., Levchenko, V.A., and Kosnik, M.A., 2019, Direct AMS <sup>14</sup>C Analysis of Carbonate:  
270 Radiocarbon, v. 61, p. 1431–1440, doi:10.1017/RDC.2019.24.
- 271 Kidwell, S.M., 2007, Discordance between living and death assemblages as evidence for  
272 anthropogenic ecological change: Proceedings of the National Academy of Sciences, v.  
273 104, p. 17701–17706, doi:10.1073/pnas.0707194104.
- 274 Kidwell, S.M., 2013, Time-averaging and fidelity of modern death assemblages: building a  
275 taphonomic foundation for conservation palaeobiology: Palaeontology, v. 56, p. 487–522,  
276 doi:10.1111/pala.12042.
- 277 Kidwell, S.M., and Tomasovych, A., 2013, Implications of time-averaged death assemblages for  
278 ecology and conservation biology: Annual Review of Ecology, Evolution, and  
279 Systematics, v. 44, p. 539–563, doi:10.1146/annurev-ecolsys-110512-135838.
- 280 Kosnik, M.A., Hua, Q., Kaufman, D.S., and Wüst, R.A., 2009, Taphonomic bias and time-  
281 averaging in tropical molluscan death assemblages: differential shell half-lives in Great  
282 Barrier Reef sediment: Paleobiology, v. 35, p. 565–586, doi:10.1666/0094-8373-  
283 35.4.565.
- 284 Kosnik, M.A., Hua, Q., Kaufman, D.S., and Zawadzki, A., 2015, Sediment accumulation,  
285 stratigraphic order, and the extent of time-averaging in lagoonal sediments: a comparison  
286 of <sup>210</sup>Pb and <sup>14</sup>C/amino acid racemization chronologies: Coral Reefs, v. 34, p. 215–229,  
287 doi:10.1007/s00338-014-1234-2.
- 288 Kowalewski, M., Avila Serrano, G.E., Flessa, K.W., and Goodfriend, G.A., 2000, Dead delta's  
289 former productivity: Two trillion shells at the mouth of the Colorado River: Geology, v.  
290 28, p. 1059, doi:10.1130/0091-7613(2000)28<1059:DDFPTT>2.0.CO;2.
- 291 Kowalewski, M., Casebolt, S., Hua, Q., Whitacre, K.E., Kaufman, D.S., and Kosnik, M.A.,  
292 2018, One fossil record, multiple time resolutions: Disparate time-averaging of echinoids  
293 and mollusks on a Holocene carbonate platform: Geology, v. 46, p. 51–54,  
294 doi:10.1130/G39789.1.
- 295 Kowalewski, M., Goodfriend, G.A., and Flessa, K.W., 1998, High-resolution estimates of  
296 temporal mixing within shell beds: The evils and virtues of time-averaging: Paleobiology,  
297 v. 24, p. 287–304, doi:10.1666/0094-8373(1998)024[0287:HEOTMW]2.3.CO;2.
- 298 Krause, R.A., Barbour, S.L., Kowalewski, M., Kaufman, D.S., Romanek, C.S., Simões, M.G.,  
299 and Wehmiller, J.F., 2010, Quantitative comparisons and models of time-averaging in  
300 bivalve and brachiopod shell accumulations: Paleobiology, v. 36, p. 428–452,  
301 doi:10.1666/08072.1.

- 302 Meldahl, K.H., Flessa, K.W., and Cutler, A.H., 1997, Time-averaging and postmortem skeletal  
303 survival in benthic fossil assemblages: Quantitative comparisons among Holocene  
304 environments: *Paleobiology*, v. 23, p. 207–229, doi:10.1017/S0094837300016791.
- 305 R Core Team, 2021, R: A Language and Environment for Statistical Computing: Vienna,  
306 Austria, R Foundation for Statistical Computing, <https://www.R-project.org>.
- 307 Reimer, P.J. et al., 2013, IntCal13 and Marine13 radiocarbon age calibration curves 0–50,000  
308 years cal BP: *Radiocarbon*, v. 55, p. 1869–1887, doi:10.2458/azu\_js\_rc.55.16947.
- 309 Ritter, M.D.N., Erthal, F., Kosnik, M.A., Coimbra, J.C., and Kaufman, D.S., 2017, Spatial  
310 variation in the temporal resolution of subtropical shallow-water molluscan death  
311 assemblages: *PALAIOS*, v. 32, p. 572–583, doi:10.2110/palo.2017.003.
- 312 RStudio Team, 2021, RStudio: Integrated Development Environment for R: Boston, MA,  
313 RStudio, PBC, <https://www.rstudio.com/>.
- 314 Spennemann, D.H.R., and Head, M.J., 1998, Tongan pottery chronology,  $^{14}\text{C}$  dates and the  
315 hardwater effect: *Quaternary Science Reviews*, v. 17, p. 1047–1056, doi:10.1016/S0277-  
316 3791(97)00100-5.
- 317 Tomašových, A., Gallmetzer, I., Haselmair, A., Kaufman, D.S., Kralj, M., Cassin, D., Zonta, R.,  
318 and Zuschin, M., 2018, Tracing the effects of eutrophication on molluscan communities  
319 in sediment cores: Outbreaks of an opportunistic species coincide with reduced  
320 bioturbation and high frequency of hypoxia in the Adriatic Sea: *Paleobiology*, v. 44, p.  
321 575–602, doi:10.1017/pab.2018.22.
- 322 Tomašových, A., Gallmetzer, I., Haselmair, A., Kaufman, D.S., Mavrič, B., and Zuschin, M.,  
323 2019, A decline in molluscan carbonate production driven by the loss of vegetated  
324 habitats encoded in the Holocene sedimentary record of the Gulf of Trieste:  
325 *Sedimentology*, v. 66, p. 781–807, doi:10.1111/sed.12516.
- 326 Ulm, S., Petchey, F., and Ross, A., 2009, Marine reservoir corrections for Moreton Bay,  
327 Australia: *Archaeology in Oceania*, v. 44, p. 160–166, doi:10.1002/j.1834-  
328 4453.2009.tb00060.x.

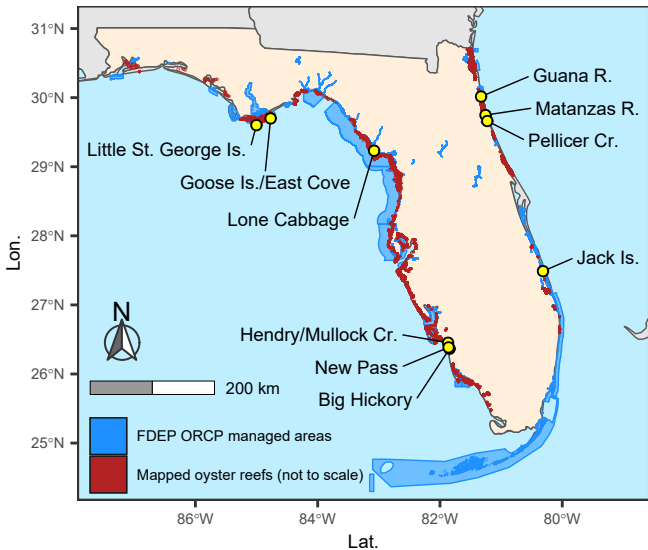

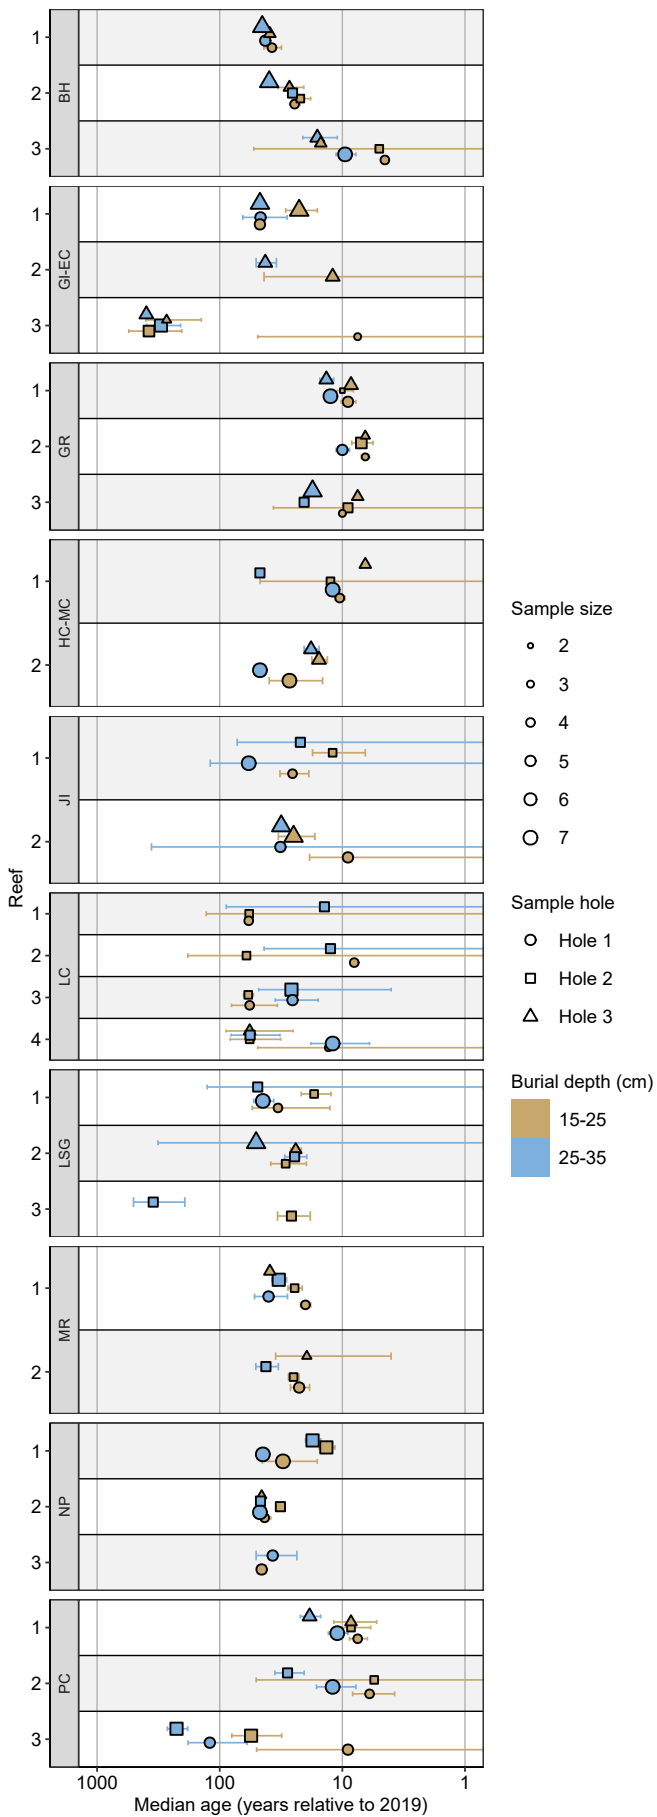



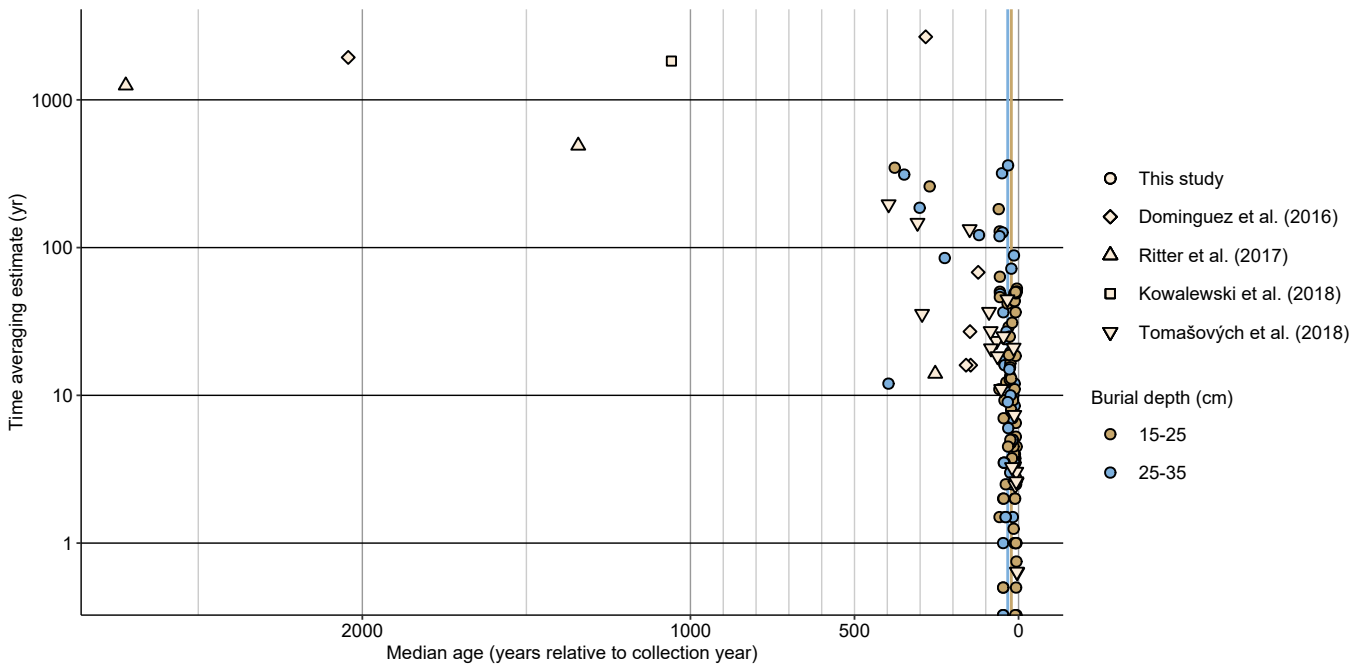

Source: https://www.biorxiv.org/content/10.1101/2022.11.05.515182v1.full.pdf
