# Supplementary material for: Age variability and time averaging in oyster reef death assemblages
Source: bioRxiv or medRxiv preprint supplement (doi:10.1101/2022.11.05.515182), 2022-11-06
Supplement: Supplementary file [file media-1.pdf]

1 Supplement to: Age variability and time averaging in oyster reef  
2 death assemblages

3 **Stephen R. Durham<sup>1</sup>, Gregory P. Dietl<sup>2,3</sup>, Quan Hua<sup>4</sup>, John C. Handley<sup>2,5</sup>, Darrell  
4 Kaufman<sup>6</sup> and Cheryl P. Clark<sup>1</sup>**

5 *<sup>1</sup>Florida Department of Environmental Protection, 2600 Blair Stone Road, MS 235, Tallahassee,  
6 FL, USA 32399*

7 *<sup>2</sup>Paleontological Research Institution, Ithaca, NY, USA 14850*

8 *<sup>3</sup>Department of Earth and Atmospheric Sciences, Cornell University, Ithaca, NY, USA 14853*

9 *<sup>4</sup>Australian Nuclear Science and Technology Organisation, Locked Bag 2001, Kirrawee DC,  
10 NSW, Australia 2232*

11 *<sup>5</sup>Simon School of Business, University of Rochester, Rochester, NY, USA 14627*

12 *<sup>6</sup>School of Earth and Sustainability, Northern Arizona University, Flagstaff, AZ, USA 86011*

13

14 **DETAILS ON SAMPLING AND AMS RADIOCARBON ANALYSES**

15 We focused our oyster reef sampling on 10 different areas around Florida that  
16 corresponded with Florida Department of Environmental Protection (FDEP) Office of Resilience  
17 and Coastal Protection (ORCP) managed areas and existing live oyster population monitoring  
18 data (Table S1). Using ArcGIS, 12 candidate reefs were randomly selected in each sampling area  
19 from the “Oyster\_Beds\_in\_Florida” map layer<sup>1</sup>, which was produced by the Oyster Integrated

---

<sup>1</sup> current version available from <https://geodata.myfwc.com/datasets/oyster-beds-in-florida?geometry=-100.316%2C24.682%2C-66.939%2C31.461>, accessed 5/19/2021.

20 Mapping and Monitoring Program of the Florida Fish and Wildlife Conservation Commission  
 21 (Radabaugh, 2019). The map layer is not comprehensive, but it is the most complete Florida  
 22 oyster reef map available. In the field, up to five reefs were semi-randomly selected for sampling  
 23 from the 12 candidate reefs (or in some cases, nearby reefs) based on factors such as  
 24 accessibility, tide level, and reef condition (e.g., presence of live oysters, likelihood of having a  
 25 substantial death assemblage).

TABLE S1. SAMPLING LOCALITIES AND ORCP MANAGED AREAS

| ORCP Managed Area                                           | Water Body                                                                                                     | Region | Date of Designation | Area (acres) | Study Localities                                  |
|-------------------------------------------------------------|----------------------------------------------------------------------------------------------------------------|--------|---------------------|--------------|---------------------------------------------------|
| Apalachicola Bay Aquatic Preserve                           | Apalachicola Bay                                                                                               | NW     | 1969                | 80,876       | Little St. George Is.                             |
| Apalachicola National Estuarine Research Reserve            | Apalachicola River, Apalachicola Bay                                                                           | NW     | 1979                | 234,691      | Little St. George Is., Goose Island/East Cove     |
| Big Bend Seagrasses Aquatic Preserve                        | Gulf of Mexico (Apalachee Bay to Waccasassa Bay)                                                               | NW     | 1985                | 984,325      | Lone Cabbage                                      |
| Estero Bay Aquatic Preserve                                 | Estero Bay                                                                                                     | SW     | 1966/1983           | 13,829       | Hendry Creek/Mullock Creek, New Pass, Big Hickory |
| Indian River-Vero Beach to Ft. Pierce Aquatic Preserve      | Indian River Lagoon                                                                                            | NE     | 1970                | 9,477        | Jack Island                                       |
| Guana Tolomato Matanzas National Estuarine Research Reserve | Guana River, Tolomato River, Matanzas River, Pellicer Creek                                                    | NE     | 1999                | 76,760       | Guana River, Matanzas River, Pellicer Creek       |
| Guana River Marsh Aquatic Preserve                          | Guana River, Tolomato River, Atlantic Ocean (Ponte Vedra Beach, from Sawgrass to ~1.5km north of Vilano Beach) | NE     | 1985                | 37,048       | Guana River                                       |

26  
 27 Death assemblage (DA) sampling of each selected oyster reef was integrated with  
 28 intertidal oyster reef monitoring methods used by FDEP staff (Dix and Marcum, 2018): a 30 m  
 29 transect tape was extended parallel to the long axis of the reef and across the portion of the reef  
 30 that appeared to have the densest accumulation of oysters, and three 0.0625 m<sup>2</sup> (25 cm x 25 cm)  
 31 quadrats were placed at distances along the transect selected with a random number generator. At  
 32 each quadrat, the top 15 cm of material was removed and placed to the side in order to reach a

33 depth below the living oysters and at which buried shells were unlikely to be re-exhumed (i.e.,  
34 below the taphonomically active zone; Powell et al., 2012; Rodriguez et al., 2014; Dix and  
35 Marcum, 2018). Once the hole was prepared, two DA samples were extracted comprising the  
36 subsequent two 10 cm depth intervals<sup>2</sup> (i.e., 15-25 cm and 25-35 cm below the reef surface).  
37 Each sample was collected into a 4 mil polyethylene sample bag labeled with the sample  
38 information. The 10 sampling areas were visited by the research team over the course of three  
39 field trips in late summer to fall of 2018; samples for each trip were cushioned with packing  
40 paper and sealed in moving boxes in groups of two to four before being transported to a climate-  
41 controlled (non-refrigerated) storage facility. After all fieldwork was completed, the boxed  
42 samples were transported to the Paleontological Research Institution in Ithaca, New York for  
43 processing and curation. Sampling was authorized by Environmental Resource Program Permit  
44 Exemption Verification 0366243-001-EE/19 (Florida Dept. of Environmental Protection),  
45 Special Activity License SAL-18-2064-SR (Florida Fish and Wildlife Conservation  
46 Commission), Division of Recreation and Parks Scientific Research/Collecting Permit 07051810  
47 (Florida Department of Environmental Protection), Nationwide Permit Number 4 SAJ-2018-  
48 01876 (U. S. Army Corps of Engineers), and a Visiting Investigator Permit from the Guana  
49 Tolomato Matanzas National Estuarine Research Reserve, all issued to S. Durham. In addition,  
50 the target sampling areas were modified prior to beginning fieldwork in response to a review by

---

<sup>2</sup> The only exception was reef 1 from New Pass, for which 15-30cm and 30-45cm depth intervals were collected. The results for these samples were similar to those of the other New Pass reefs, so we did not distinguish between the 15-30cm and 15-25cm or the 30-45cm and 25-35cm DA sample results in our analysis.

51 the Florida Department of State Division of Historical Resources to ensure no impact to  
52 archaeological resources (DHR Project File 2018-3543). Ownership of all samples collected was  
53 transferred to the Paleontological Research Institution for long-term storage (PRI Accession  
54 Number 1860).

55 In the laboratory, each sample bag was emptied over stacked 6 mm and 1.9 mm mesh  
56 sieves, and a subsample of the matrix material was collected before the sediment was washed  
57 and the oyster shells were separated from the other material. All left valves  $\geq 25$  mm in shell  
58 height and estimated to be at least 90% complete in each DA sample were assigned numbers that  
59 were used to randomly select specimens for radiocarbon analysis and index specimens for  
60 additional data collection. Initially, 25 specimens were randomly selected for radiocarbon  
61 analysis from all numbered specimens across all processed DA samples from the same reef x  
62 stratigraphic interval (i.e., 15-25 cm or 25-35 cm burial depths). From those 25 specimens, 12-14  
63 specimens were selected for analysis such that each processed DA sample was represented by at  
64 least two specimens. Otherwise, specimens were evaluated in the order in which they were  
65 selected and any specimens with substantial bioerosion or other damage to the hinge plate were  
66 rejected due to the higher potential for chemical alteration of the shell interior. However, it  
67 became clear early on that specimens from the same burial depth but different locations on a reef  
68 often varied in age, so we began randomly selecting 8-10 specimens from each processed DA  
69 sample, from which between four and seven specimens were chosen for analysis as previously  
70 described. This method ensured that most processed samples were represented by at least four  
71 specimens and that all reef x stratigraphic intervals were represented by at least five specimens.

72 A wedge of shell was cut out of the hinge plate of each selected specimen using a  
73 Gryphon C-40 diamond bandsaw, after which the fragments were air-dried at room temperature

74 and placed in labeled polyethylene bags. All specimens were shipped to Northern Arizona  
75 University, where subsamples of the foliated calcite portions of each fragment were prepared for  
76 radiocarbon analysis following procedures modified from Bush et al. (2013). Briefly, fragments  
77 were leached in 2N HCl to remove approximately 30% of their mass, dried, and ground to a fine  
78 powder. Between 0.3 and 0.5 mg of carbonate was mixed with metal powder and pressed into  
79 accelerator mass spectrometry (AMS) targets. Once prepared, samples were analyzed at the W.  
80 M. Keck Carbon Cycle AMS facility at the University of California, Irvine. In order to date as  
81 many specimens as possible, the majority of analyses were performed on powdered carbonate  
82 targets, which are less costly to analyze, but have lower precision than the graphite targets used  
83 in standard AMS radiocarbon analyses (Bush et al., 2013; Hua et al., 2019; Bright et al., 2021).  
84 Eleven specimens were re-analyzed by standard AMS radiocarbon analyses to check the lower-  
85 precision radiocarbon results. Additional standard AMS analyses were also conducted on live-  
86 caught filter-feeding clams from near the mouth of Alligator Harbor, Florida (approximate  
87 lat./long.: 29.910016, -84.429683) and at least one live-caught oyster from each locality. These  
88 analyses were used to estimate local “dead carbon” corrections for the dead shell radiocarbon  
89 results before they were calibrated to calendar ages. The dead carbon contribution is likely due to  
90 the hardwater effect as a result of geological settings (e.g., Spennemann and Head, 1998) and/or  
91 estuarine influences resulting from riverine discharges with incomplete  $^{14}\text{C}$  mixing with the open  
92 ocean (e.g., Ulm et al., 2009), and is assumed to affect all specimens within a site/reef equally  
93 through time. In addition, we dated four museum oyster specimens of known age to test the  
94 accuracy of their calibrated dates using our method of dead carbon corrections and age  
95 calibration. Live oyster specimens were collected either by staff from the Florida Department of  
96 Agriculture and Consumer Services under the Department’s public health authority for the

97 sanitary control of shellfish (*Florida Statutes* section 597.020 and Florida Administrative Code  
98 Rule 5L-1) or by FDEP staff under Special Activity License SAL-20-2259A-SR issued by the  
99 Florida Fish and Wildlife Conservation Commission to S. Durham. Ownership of all live-caught  
100 specimens was transferred to the Paleontological Research Institution for long-term storage (PRI  
101 Accession Number 1897).

102

### 103 **RADIOCARBON GEOCHRONOLOGY CALIBRATION AND RESULTS**

104 Reduced major axis regression of eleven DA specimens by both low-precision and  
105 standard AMS showed a strong relationship (slope = 0.994,  $R^2 = 0.97$ ), justifying our use of the  
106 lower-precision method (Fig. DR1). These results are similar to those of a much larger  
107 comparison study demonstrating the strong correspondence between radiocarbon values  
108 measured by the two AMS methods (Bright et al., 2021).

109

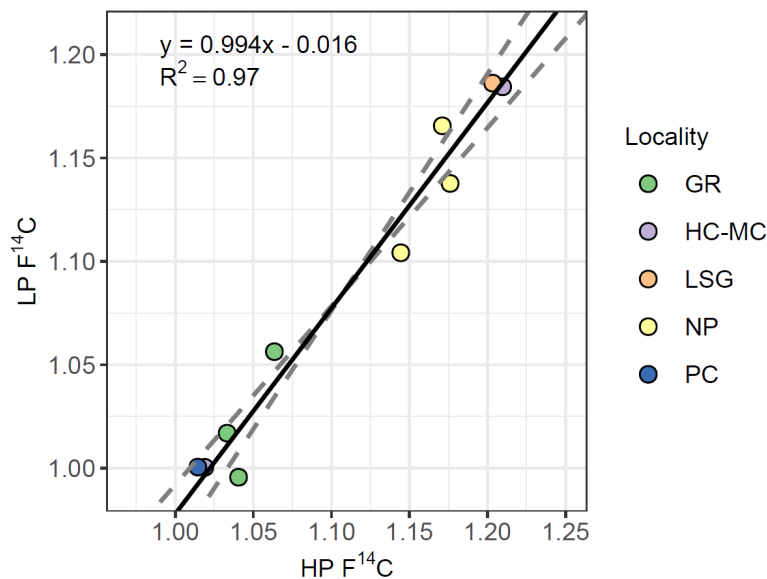

110

111 Figure DR1. Reduced axis regression of standard (high precision, graphite targets) AMS

112 radiocarbon results in fraction modern carbon (HP F<sup>14</sup>C) for death assemblage specimens against

113 low-precision (carbonate target) AMS radiocarbon results (LP  $F^{14}C$ ) for the same specimens.  
 114 Solid line = reduced axis regression line, dashed lines = 97.5 % confidence interval. Localities  
 115 are listed in counter-clockwise geographic order around the state, starting at the panhandle: LSG  
 116 = Little St. George Island, HC-MC = Hendry Creek/Mullock Creek, NP = New Pass, PC =  
 117 Pellicer Creek, GR = Guana River.

118 “Dead carbon” contribution in each sample area ( $DeadC_{Local}$ ) was estimated using the  
 119 fraction modern carbon ( $n = 1$ ) or weighted mean fraction modern carbon ( $n = 2$ ) value of local  
 120 live-caught oyster specimens ( $F^{14}C_{Oyster}$ ) and the weighted mean value of two live-caught  
 121 *Mercenaria* sp. specimens ( $F^{14}C_{Clam}$ ) from near the mouth of Alligator Harbor in northwest  
 122 Florida (Tables DR1, DR2):

$$123 \quad DeadC_{Local} = 1 - \frac{F^{14}C_{Oyster}}{F^{14}C_{Clam}} \quad (1)$$

124 The clams were used because they came from a full-marine salinity environment, so were not  
 125 expected to be influenced as much by hardwater and/or estuarine effects as the estuarine *C.*  
 126 *virginica* specimens.

127 Prior to calibration, the  $F^{14}C$  value for each dead shell specimen dated from each locality  
 128 was corrected using the corresponding local dead carbon estimate:

$$129 \quad F^{14}C_{Corrected} = \frac{F^{14}C_{Local}}{(1-DeadC_{Local})} \quad (2)$$

130 where  $F^{14}C_{Local}$  is the measured  $^{14}C$  content of a dead shell specimen. The dead carbon corrected  
 131  $F^{14}C$  standard deviations were calculated as:

$$132 \quad SD_{Corrected} = \sqrt{\left(\frac{SD_{Local}F^{14}C}{(1-DeadC_{Local})}\right)^2 + \left(SD_{Local}DeadC \times \frac{F^{14}C_{Local}}{(1-DeadC_{Local})^2}\right)^2} \quad (3)$$

133 where  $SD_{LocalDeadC}$  and  $SD_{LocalF^{14}C}$  are uncertainties associated with the local dead carbon  
 134 contribution and the measured  $F^{14}C$  value of a dead shell specimen, respectively.

135 The corrected  $F^{14}C$  values were then calibrated using OxCal v4.4 (Bronk Ramsey, 2009),  
 136 and the Marine20 calibration curve (Heaton et al., 2020) with a constant regional marine  
 137 reservoir correction— $\Delta R = -134 \pm 26$  years, which is equivalent to  $5 \pm 32$  years (Kowalewski et  
 138 al., 2018) relative to Marine13 (Reimer et al., 2013)—extended to 2019 using the regional  
 139 marine bomb radiocarbon data (Kowalewski et al., 2018) and the weighted mean  $F^{14}C$  value  
 140 from the two live-caught *Mercenaria* sp. specimens from this study. The calibrated ages and  
 141 time-averaging estimates for the oyster DA samples were calculated as described in the main text  
 142 and Kowalewski et al. (2018). See Appendix DR1 for the DA sample ages and time-averaging  
 143 estimates, Appendix DR2 for uncalibrated high-precision AMS radiocarbon results, Appendix  
 144 DR3 for uncalibrated low-precision AMS radiocarbon results, and Appendix DR4 for the  
 145 posterior probability distributions from the OxCal output for all calibrated radiocarbon ages.

146

TABLE DR2. DEAD CARBON ESTIMATES FOR EACH LOCALITY

| Locality                   | Genus              | N | Weighted Mean $F^{14}C$ | $\pm$  | Dead C ( $F^{14}C$ ) | $\pm$  |
|----------------------------|--------------------|---|-------------------------|--------|----------------------|--------|
| Little St. George Is.      | <i>Crassostrea</i> | 2 | 1.0026                  | 0.0069 | 0.0079               | 0.0071 |
| Goose Island/East Cove     | <i>Crassostrea</i> | 2 | 1.0120                  | 0.0014 | -0.0014              | 0.0022 |
| Alligator Harbor*          | <i>Mercenaria</i>  | 2 | 1.0106                  | 0.0017 | NA                   | NA     |
| Lone Cabbage               | <i>Crassostrea</i> | 2 | 0.9225                  | 0.0039 | 0.0872               | 0.0041 |
| Hendry Creek/Mullock Creek | <i>Crassostrea</i> | 2 | 0.9768                  | 0.0030 | 0.0334               | 0.0034 |
| New Pass                   | <i>Crassostrea</i> | 2 | 0.9972                  | 0.0042 | 0.0132               | 0.0045 |
| Big Hickory                | <i>Crassostrea</i> | 1 | 0.9900                  | 0.0022 | 0.0204               | 0.0027 |
| Jack Island                | <i>Crassostrea</i> | 2 | 1.0082                  | 0.0021 | 0.0024               | 0.0027 |
| Pellicer Creek             | <i>Crassostrea</i> | 2 | 1.0109                  | 0.0039 | -0.0003              | 0.0042 |
| Matanzas River             | <i>Crassostrea</i> | 2 | 1.0229                  | 0.0014 | -0.0122              | 0.0022 |
| Guana River                | <i>Crassostrea</i> | 2 | 0.9974                  | 0.0038 | 0.0130               | 0.0041 |

\*Location for full-marine salinity clam specimens; no oysters collected.

†Localities are listed in counter-clockwise geographic order around the state, starting at the panhandle.

147

148 We also dated four specimens of known age from the Florida Museum of Natural History



149 as a check on the dead carbon correction and age calibration procedures. Two of the four  
150 specimens had a known collection date of 1979 and were collected from the northwest coast of  
151 Cedar Key Island, within about 10 km of the Lone Cabbage locality. Using the local dead carbon  
152 correction developed for the Lone Cabbage locality, the median calibrated ages of the two  
153 museum specimens were both 1972 and their age ranges at 95% CI were 1967.0-1982.5 (Table  
154 DR3). The two other museum specimens were collected farther from our localities; one was  
155 collected in Indian Pass, Franklin County in 1938 (approximately 20 km northwest of the Little  
156 St. George Island locality) and the other was collected in Gordon Pass, Collier County in 1932  
157 (approximately 30 km south of the Big Hickory locality), so the dead carbon corrections for  
158 those localities are not as likely to be appropriate as the Lone Cabbage values were for the Cedar  
159 Key Island specimens. Further, these specimens lived prior to the atmospheric nuclear testing in  
160 the 1950s and 1960s, which produced the “bomb pulse” radiocarbon signature that allows for  
161 much higher-resolution radiocarbon dating for many materials generated after the mid-1950s  
162 (Hua, 2009). Considering these factors, the median calibrated age of 1916.5 for the specimen  
163 from Gordon Pass was reasonable, while the broad calibrated age range associated with the  
164 median calibrated age of 1853.5 for the specimen from Indian Pass was not surprising.  
165 Altogether, the results of these analyses supported the validity of the age estimates from the dead  
166 carbon correction and radiocarbon calibration procedures.

167

168

169

170

171

TABLE DR3. RADIOCARBON RESULTS FROM SPECIMENS OF KNOWN AGE AND MINIMUM, MAXIMUM, AND MEDIAN CALIBRATED POSTERIOR AGES FOR EACH SPECIMEN

| FLMNH<br>Cat. No.* | Collection<br>Date | Nearest<br>Locality†     | Sample ID | F <sup>14</sup> C | ±      | Dead C | ±      | Corrected<br>F <sup>14</sup> C | ±      | Age Range |        | Median<br>Cal. Age |
|--------------------|--------------------|--------------------------|-----------|-------------------|--------|--------|--------|--------------------------------|--------|-----------|--------|--------------------|
|                    |                    |                          |           |                   |        |        |        |                                |        | Min.      | Max.   |                    |
| UF 15484           | 1938               | Little St.<br>George Is. | UAL19523  | 0.9338            | 0.0018 | 0.0079 | 0.0071 | 0.9412                         | 0.0069 | 1515.0    | 1961.0 | 1853.5             |
| UF 512435          | 1979               | Lone<br>Cabbage          | UAL19520  | 1.1573            | 0.0022 | 0.0872 | 0.0041 | 1.2678                         | 0.0062 | 1967.0    | 1982.5 | 1972.0             |
|                    |                    |                          | UAL19521  | 1.1068            | 0.0024 | 0.0872 | 0.0041 | 1.2125                         | 0.0061 | 1967.0    | 1982.5 | 1972.0             |
| UF 15491           | 1932               | Big Hickory              | UAL19522  | 0.9405            | 0.0019 | 0.0250 | 0.0054 | 0.9645                         | 0.0057 | 1686.0    | 1961.0 | 1916.5             |

\*Florida Museum of Natural History catalog number (<http://specifyportal.flmnh.ufl.edu/iz/>)

†Localities are listed in counter-clockwise geographic order around the state, starting at the panhandle

172

### 173 GEOGRAPHIC AND TEMPORAL VARIABILITY ASSESSMENT

174 Assessment of geographic and temporal dimensions of variability in the median ages and  
 175 corrected posterior age estimates (CPE) for our death assemblage DA samples was complicated  
 176 by the fact that these metrics vary both stratigraphically and spatially within a given depth  
 177 interval, meaning the proxy variables available to us (i.e., sample hole and burial depth) are  
 178 imperfect representations of spatial and temporal variability. Nevertheless, a comparison of  
 179 sample age and CPE variability with space and depth would be informative about the consistency  
 180 of the age and time-averaging structure of oyster reef death assemblages.

181 We used a hierarchical Bayesian model to assess the variability in median age and CPE at  
 182 the statewide, locality, reef, and sample hole geographic strata. Our model generated locality  
 183 means from a single statewide mean according to:

$$184 \quad c_l = e + \zeta_c, l = 1, \dots, nL, \zeta_c \sim N(0, \sigma_c^2) \quad (4)$$

185 where  $c_l$  is the locality-level mean at locality  $l$ ,  $e$  is the statewide mean,  $nL$  is the number of  
 186 localities, and locality-level means were assumed to be distributed normally with mean of 0 and  
 187 standard deviation  $\sigma_c$ . Reef means were generated from each corresponding locality mean  
 188 according to:

$$189 \quad r_{kl} = c_l + \zeta_r, k = 1, \dots, nR_l, l = 1, \dots, nL, \zeta_r \sim N(0, \sigma_r^2) \quad (5)$$

190 where  $r_{kl}$  is the reef-level mean for reef  $k$  at locality  $l$ ,  $nR_l$  is the number of reefs at locality  $l$ ,  
 191 and reef-level means were assumed to be normally distributed with mean of 0 and standard  
 192 deviation  $\sigma_r$ . Observations for the constituent sample holes on each reef were generated from the  
 193 reef means according to:

$$194 \quad x_{jkl} = r_{kl} + \zeta_h, j = 1, \dots, nH_{kl}, k = 1, \dots, nR_l, l = 1, \dots, nL, \zeta_h \sim N(0, \sigma_h^2) \quad (6)$$

195 where  $x_{jkl}$  is the observation for sample  $j$  from reef  $k$  at locality  $l$ ,  $nH_{kl}$  is the number of  
 196 samples from reef  $k$ , and the sample observations were assumed to be normally distributed with  
 197 mean of 0 and standard deviation  $\sigma_h$ . We fit the model to median DA sample age and CPE data  
 198 for the 15-25 cm and 25-35 cm burial-depths, as well as their difference (25-35 cm values – 15-  
 199 25 cm values) using the cmdstanr v.0.4.0 interface to Stan in R statistical software v.4.1.1 (Gabry  
 200 and Cesnovar, 2021; R Core Team, 2021).

201 The statewide median modeled  $e$  for median age was slightly greater for the 25-35 cm  
 202 burial depth (95 % credible interval of the median difference estimate did not include zero), and  
 203 there was a much smaller, non-significant, increase in median CPE with burial depth, suggesting  
 204 that median age tended to increase with burial depth, but the degree of time-averaging did not  
 205 (Table DR4). In contrast, variation in both median age and CPE tended to increase with burial

TABLE DR4. STATEWIDE RESULTS OF HIERARCHICAL MIXED EFFECTS MODELS OF MEDIAN AGE AND CPE, INCLUDING STATEWIDE MEAN AND STANDARD DEVIATIONS AT LOCALITY, REEF AND SAMPLE HOLE SCALES

| Variable   | Category                | $e$    |        |        | $\sigma_c$ |      |       | $\sigma_r$ |      |        | $\sigma_h$ |       |        |
|------------|-------------------------|--------|--------|--------|------------|------|-------|------------|------|--------|------------|-------|--------|
|            |                         | Median | 5 %**  | 95 %** | Median     | 5 %  | 95 %  | Median     | 5 %  | 95 %   | Median     | 5 %   | 95 %   |
| Median age | 15-25 cm                | 27.90  | 16.66  | 39.55  | 1.26       | 0.16 | 18.03 | 1.99       | 0.25 | 32.47  | 53.14      | 41.81 | 63.36  |
|            | 25-35 cm                | 40.63  | 18.70  | 64.37  | 0.90       | 0.02 | 7.95  | 74.11      | 3.18 | 100.24 | 28.83      | 22.00 | 79.94  |
|            | Difference <sup>†</sup> | 14.83  | 2.28   | 27.04  | 1.06       | 0.13 | 8.61  | 1.05       | 0.11 | 9.97   | 58.05      | 49.00 | 69.99  |
| CPE*       | 15-25 cm                | 24.35  | 12.02  | 36.66  | 1.32       | 0.13 | 21.50 | 4.33       | 0.23 | 37.77  | 53.88      | 41.49 | 65.28  |
|            | 25-35 cm                | 29.06  | 12.00  | 45.15  | 1.08       | 0.12 | 12.96 | 0.93       | 0.11 | 6.24   | 84.47      | 71.54 | 101.32 |
|            | Difference <sup>†</sup> | 6.34   | -11.03 | 23.79  | 1.06       | 0.14 | 14.33 | 0.94       | 0.12 | 7.82   | 96.16      | 81.47 | 114.67 |

\*CPE = corrected posterior age estimate

<sup>†</sup>Differences calculated as (25-35 cm value - 15-25 cm value) for each sample hole

\*\*5 % and 95 % columns denote the 95 % credible intervals

206 depth (Table DR4, Figures DR2 to DR7). For most variable and category combinations,  
207 standard deviations from the locality level and the reef level were similar, but the standard  
208 deviations of all combinations increased from the reef level to the sample hole level. Overall, the  
209 magnitudes of the variation in differences with burial depth for median age and CPE were  
210 comparable to their variation within each burial depth (Table DR4, Figures DR2 to DR7).

211         These results suggest that spatial variation needs to be considered when planning  
212 geochronological investigations of oyster death assemblages because it cannot be assumed that  
213 samples taken from the same burial depth within a reef (even only a few meters apart) were  
214 deposited contemporaneously. Still, as noted in the main text, comparison of our statewide oyster  
215 death assemblage results with those of Dominguez et al. (2016), whose study examined age and  
216 time-averaging of death assemblages at six sites in Sydney Harbour (all at ~9 m water depth),  
217 suggests that despite the substantial geographic variability in median ages and CPE in our study,  
218 the *C. virginica* death assemblages were still more spatially and temporally consistent than a  
219 non-reef nearshore shelf molluscan death assemblage (Figures DR2 to DR7).

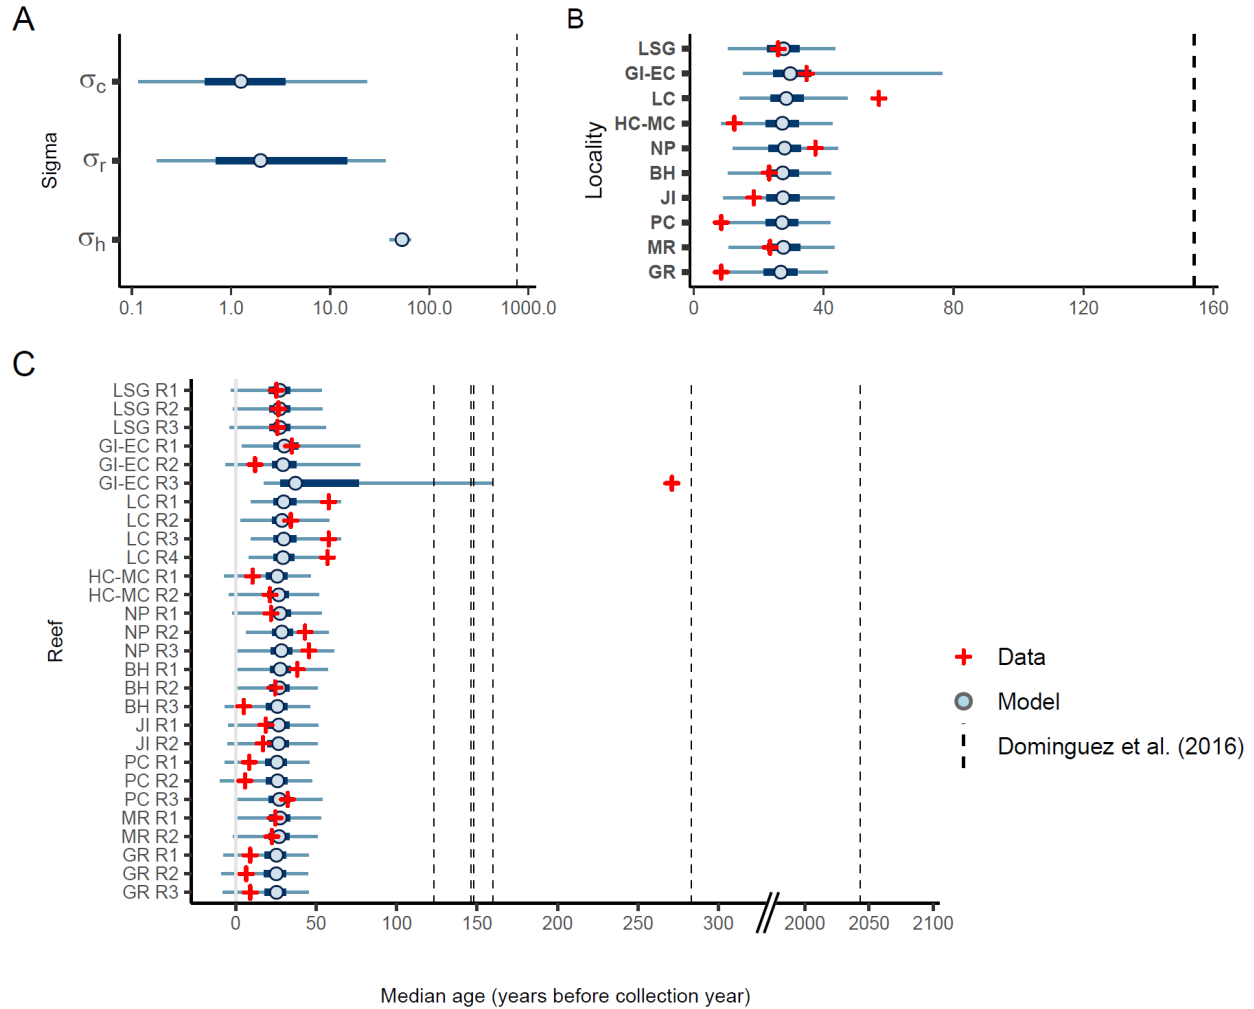

220  
 221 Figure DR2. Plots showing A) estimated standard deviations and medians of the median  
 222 calibrated ages (relative to 2019) B) by locality and C) by reef for 15-25 cm burial depth in  
 223 relation to the values calculated from data. Standard deviation, median, and sample-level median  
 224 ages (relative to 2013) from Dominguez et al. (2016) are also shown in A) to C), respectively, as  
 225 a comparison between the oyster reef death assemblages and an example of a non-reef (*Fulvia*  
 226 *tenuicostata*) death assemblage. Sigma categories correspond to the hierarchical model  
 227 coefficients (see text for details):  $\sigma_c$  = locality-level standard deviation,  $\sigma_r$  = reef-level standard  
 228 deviation,  $\sigma_h$  = sample-hole-level standard deviation. Localities are listed on the y axis in

229 counter-clockwise geographic order around the state, starting at the panhandle: LSG = Little St.  
 230 George Island, GI-EC = Goose Island/East Cove, LC = Lone Cabbage, HC-MC = Hendry  
 231 Creek/Mullock Creek, NP = New Pass, BH = Big Hickory, JI = Jack Island, PC = Pellicer Creek,  
 232 MR = Matanzas River, GR = Guana River. Thick horizontal blue lines = 50 % credible intervals,  
 233 thin horizontal blue lines = 95 % credible intervals.

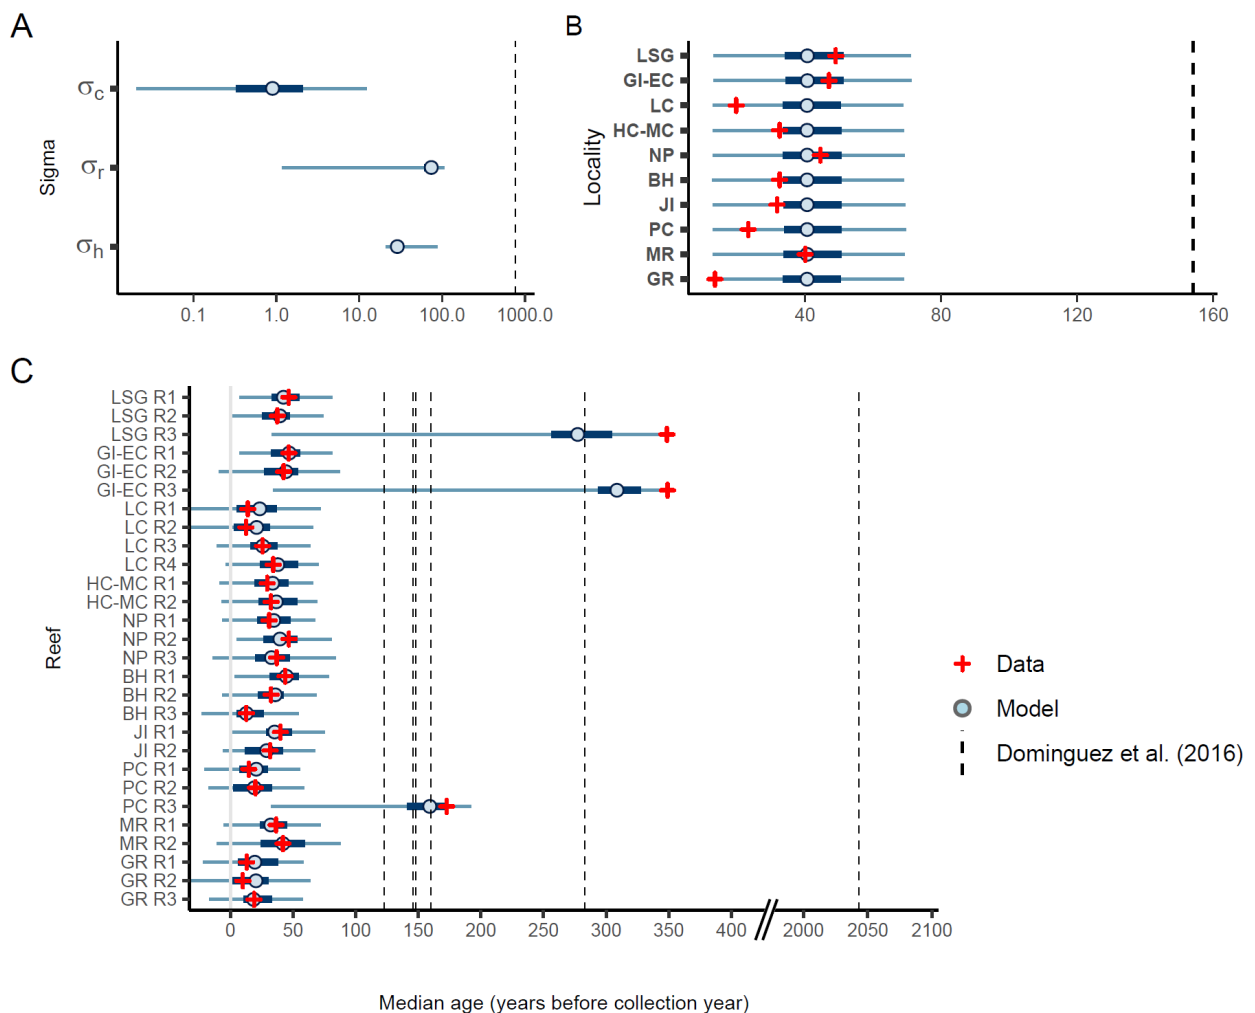

234 Figure DR3. Same plots as shown in Fig. DR2, but for the DA samples from the 25-35 cm depth  
 235 interval. See Fig. DR2 caption for plot annotation details.  
 236

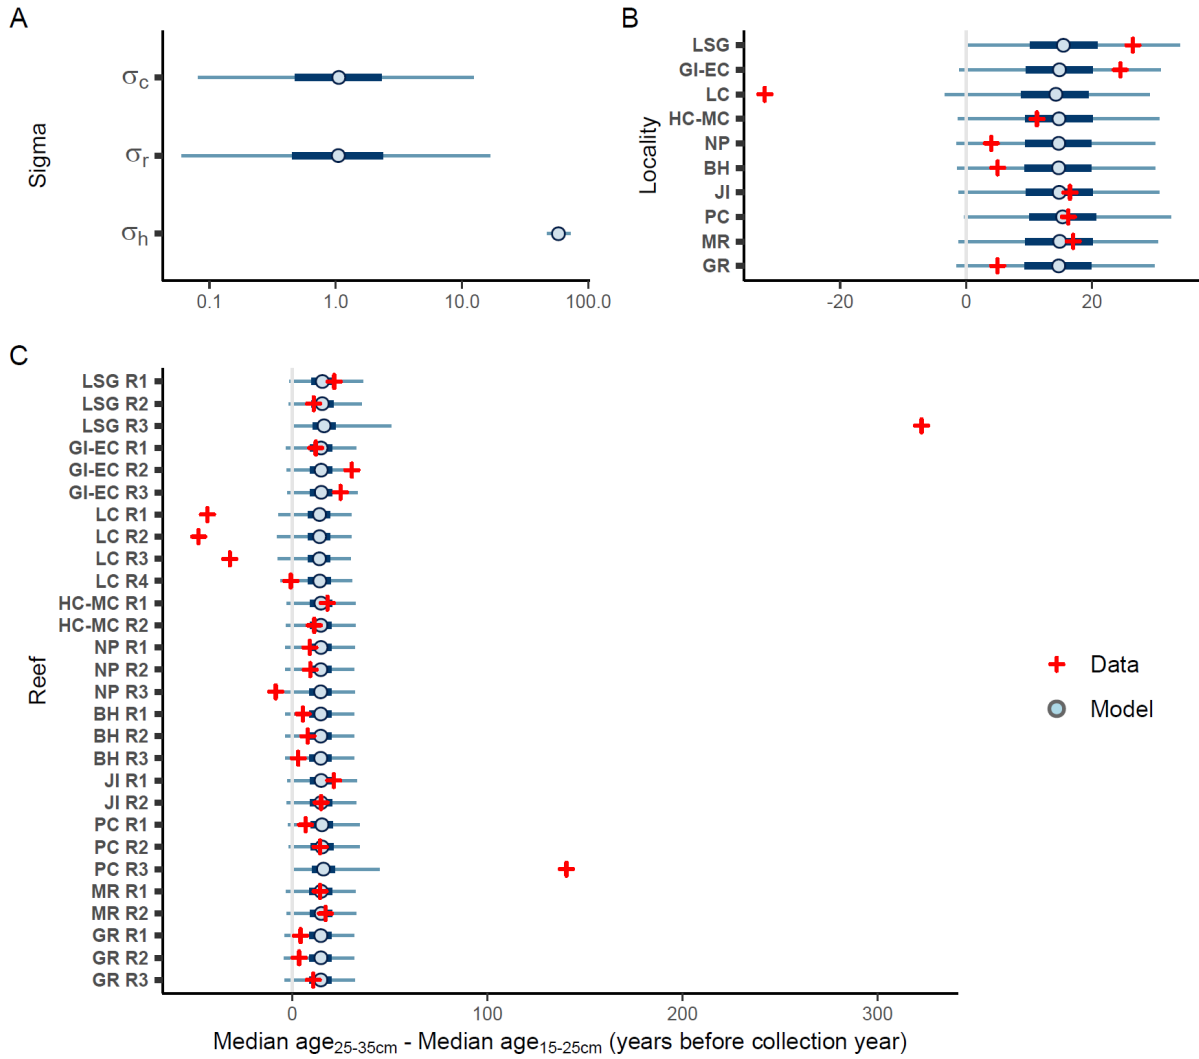

237  
 238 Figure DR4. Plots showing A) modeled standard deviations for locality, reef, and sample hole,  
 239 and median values for the B) locality and C) reef-level coefficients as in Figs. DR2 and DR3, but  
 240 for the differences between 25-35 cm and 15-25 cm burial depth median posterior ages. See Fig.  
 241 DR2 caption for plot annotation details.

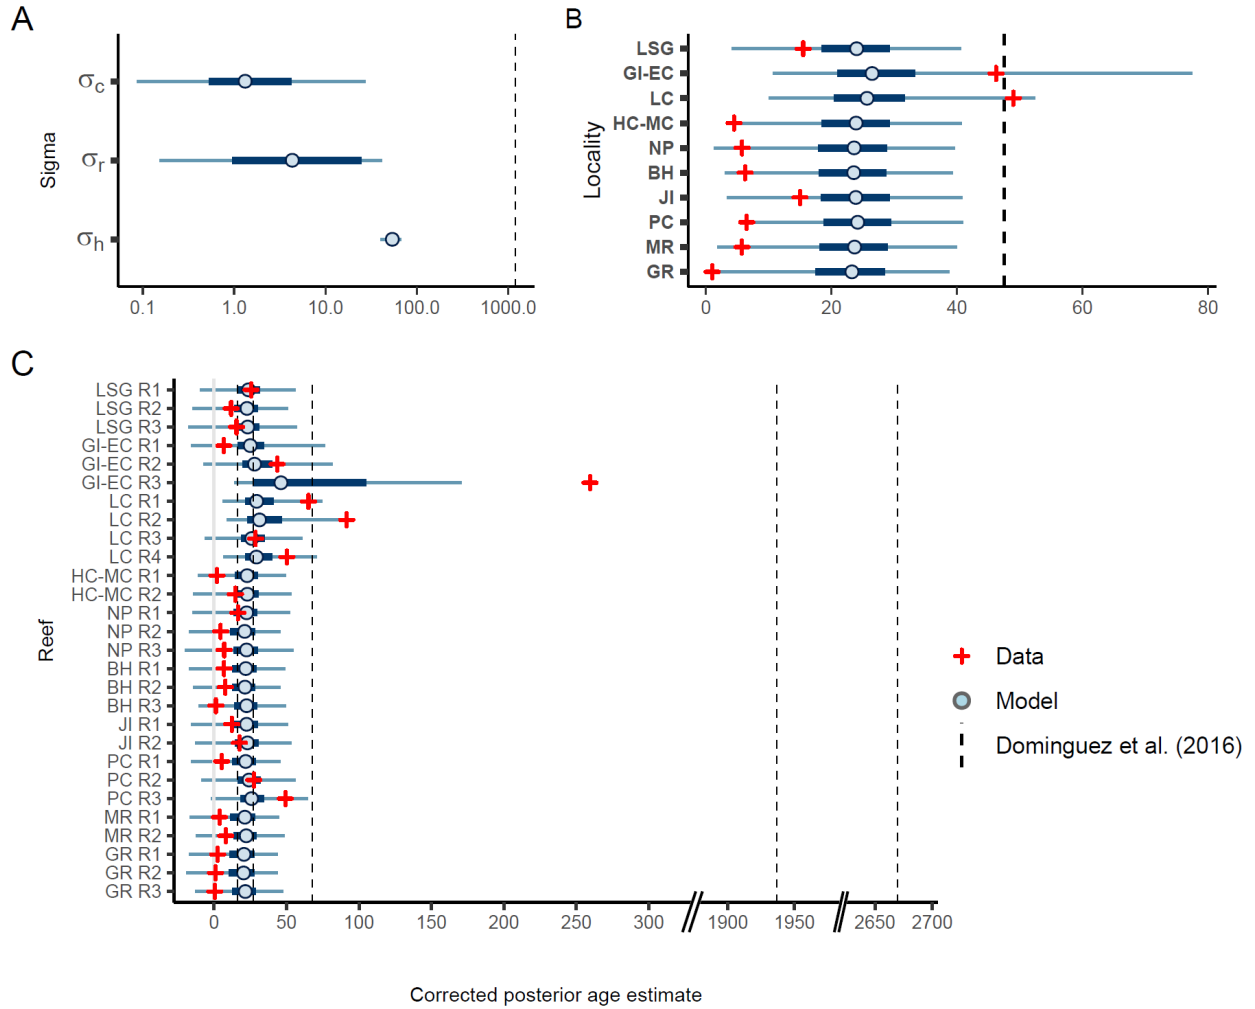

242  
 243 Figure DR5. Plots as described in the caption for Fig. DR2 but showing model results for  
 244 estimated standard deviations and median corrected posterior age estimates (CPE). See Fig. DR2  
 245 caption for plot annotation details.



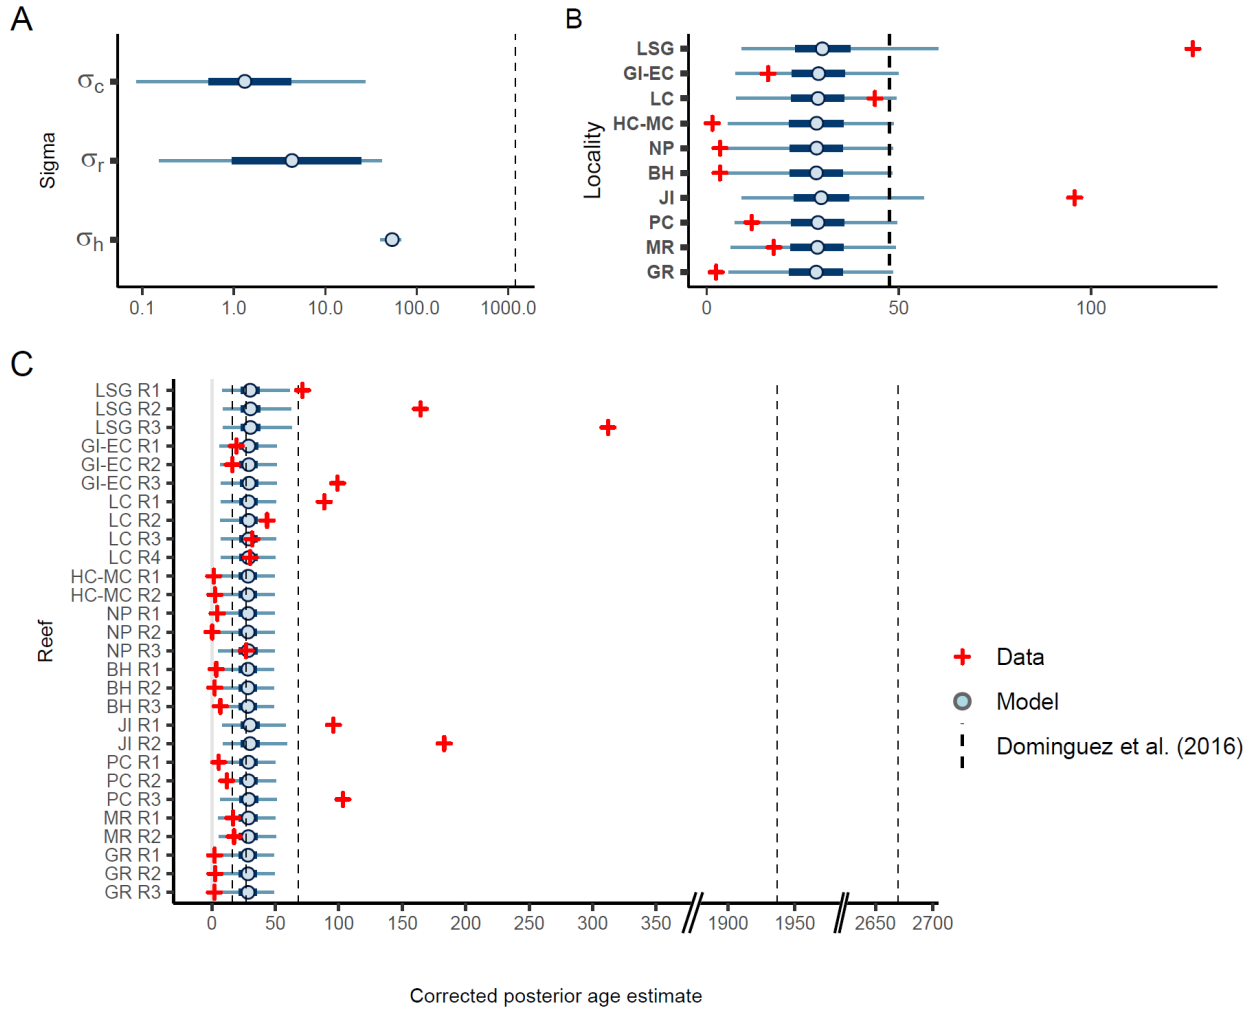

246  
 247 Figure DR6. Plots as described in the caption for Fig. DR3 but showing model results for  
 248 estimated standard deviations and median corrected posterior age estimates (CPE). See Fig. DR3  
 249 caption for plot annotation details.

250  
 251

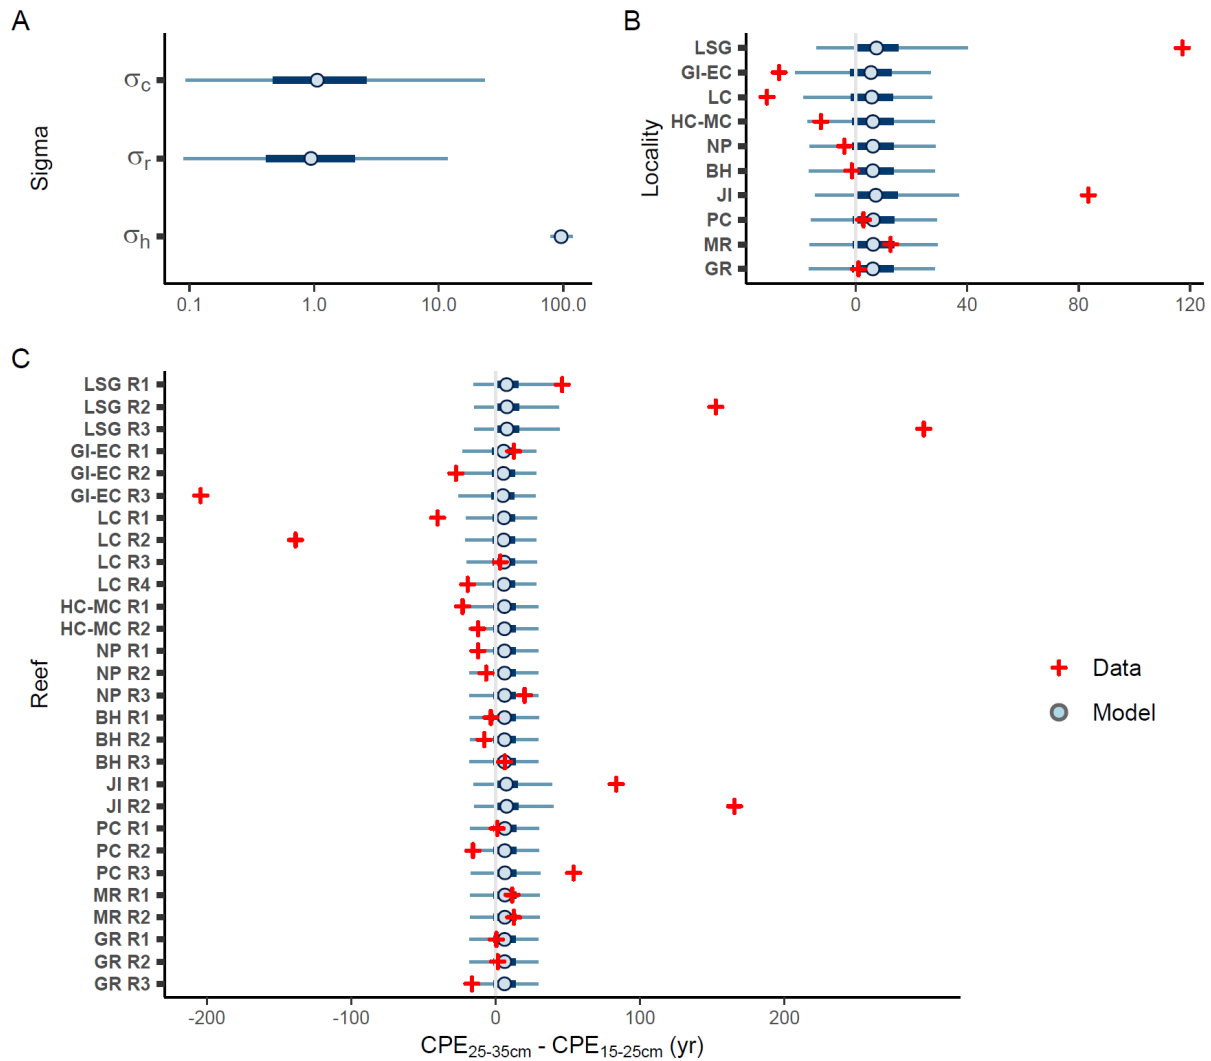

252  
 253 Figure DR7. Plots as described in the caption for Fig. DR4 but showing model results for  
 254 estimated standard deviations and median differences between 25-35 cm and 15-25 cm burial  
 255 depth corrected posterior age estimates (CPE). See Fig. DR4 caption for plot annotation details.

256  
 257 **Example of geographic variability in death assemblage characteristics**

258 Age-depth relationships and scales of time-averaging within an oyster reef DA are  
 259 products of a complex interaction of processes that can vary on a local scale, including  
 260 sedimentation rate, reef subsidence, rates of physical and chemical shell destruction on the reef,

261 rates of shell mixing on the reef from storms or bioturbators such as stone crabs, as well as  
262 population demographics and recruitment dynamics of the living oyster population, which  
263 controls the addition of new shell to the assemblage (Bahr and Lanier, 1981; Hargis and Haven,  
264 1999; Powell et al., 2012; Rodriguez et al., 2014).

265         These factors are spatially heterogeneous, even on fine spatial scales (i.e., meters; Fig. 2).  
266 Some individual reefs in our study showed multi-decadal or even centennial-scale variation in  
267 median ages and/or time-averaging estimates for DA samples from the same burial depth. For  
268 instance, the minimum and maximum median ages among the three 15-30cm depth interval  
269 samples from Reef 1 at New Pass differed by 17 years and the minimum and maximum CPE for  
270 the same group of samples differed by 25 years. The overall average within-burial-depth  
271 difference between minimum and maximum median DA sample ages by reef ( $\pm$  S.D.) was  $24.9 \pm$   
272  $56.8$  years, and the corresponding average difference for CPE was  $47.5 \pm 84.0$  years.

273         Some of the impacts—such as variability in burial rates—are evident in the  
274 geochronological results. For instance, DA samples from both burial depths at the Guana River  
275 locality are younger than most other localities (Fig. 2). These data are consistent with field  
276 observations that suggested a relatively rapid shell burial rate: many Guana River reefs had high  
277 relief ( $\sim 1$  m), vertically oriented oyster clump growth, and were covered with fine sediments.  
278 These characteristics contrasted with those of reefs at other localities, many of which had lower  
279 reef heights, coarser, firmer sediments and more rounded, dense oyster clump growth than the  
280 Guana River reefs. Altogether, these observations suggest that the burial rate of oyster shell on  
281 the reefs at Guana River is more rapid than at reefs elsewhere in the state.

282

283

284 **REFERENCES**

- 285 Bahr, L.M., and Lanier, W.P., 1981, The Ecology of Intertidal Oyster Reefs of the South Atlantic  
286 Coast: A Community Profile: Washington, D.C., U.S. Fish and Wildlife Service, Office  
287 of Biological Services, FWS/OBS-81/15, 105 p.
- 288 Bright, J., Kaufman, D.S., Whitacre, K., Ebert, C., Southon, J.R., Albano, P., Flores, C., Frazer,  
289 T.K., Hau, Q., Kosnik, M.A., Kowalewski, M., Martinelli, J.D., Oakley, D., Parker,  
290 W.G., Retelle, M., Ritter, M.N., Rivadeneria, M.M., Scarponi, D., Yanes, Y., and  
291 Zuschin, M., 2021, Comparing rapid and standard <sup>14</sup>C ages from an assortment of  
292 biogenic carbonates: Radiocarbon, v. 63, p. 387-403. doi:10.1017/RDC.2020.131
- 293 Bronk Ramsey, C., 2009, Bayesian analysis of radiocarbon dates: Radiocarbon, v. 51, p. 337–  
294 360, doi:10.1017/S0033822200033865.
- 295 Bush, S.L., Santos, G.M., Xu, X., Southon, J.R., Thiagarajan, N., Hines, S.K., and Adkins, J.F.,  
296 2013, Simple, rapid, and cost effective: a screening method for 14 C analysis of small  
297 carbonate samples: Radiocarbon, v. 55, p. 631–640, doi:10.1017/S0033822200057787.
- 298 Dix, N., and Marcum, P., 2018, Oyster Monitoring Protocol 1.3, Guana Tolomato Matanzas  
299 National Estuarine Research Reserve, 7 p., [https://data.florida-](https://data.florida-seacar.org/programs/details/4000)  
300 [seacar.org/programs/details/4000](https://data.florida-seacar.org/programs/details/4000)
- 301 Dominguez, J.G., Kosnik, M.A., Allen, A.P., Hua, Q., Jacob, D.E., Kaufman, D.S., and  
302 Whitacre, K., 2016, Time-averaging and stratigraphic resolution in death assemblages  
303 and holocene deposits: Sydney Harbour’s molluscan record: PALAIOS, v. 31, p. 563–  
304 574, doi:10.2110/palo.2015.087.
- 305 Gabry, J., and Cesnovar, R., 2021, cmdstanr: R Interface to “CmdStan”:, [https://mc-](https://mc-stan.org/cmdstanr)  
306 [stan.org/cmdstanr](https://mc-stan.org/cmdstanr), <https://discourse.mc-stan.org>.
- 307 Hargis, W.J., and Haven, D.S., 1999, Chesapeake oyster reefs, their importance, destruction and  
308 guidelines for restoring them, *in* Luckenbach, M.W., Mann, R., and Wesson, J.A. eds.,  
309 Oyster Reef Habitat Restoration: A Synopsis and Synthesis of Approaches, Gloucester  
310 Point, Virginia, Virginia Institute of Marine Science Press, p. 329–358.
- 311 Heaton, T.J. et al., 2020, Marine20 - the marine radiocarbon age calibration curve (0–55,000 cal  
312 BP): Radiocarbon, v. 62, p. 779–820, doi:10.1017/RDC.2020.68.
- 313 Hua, Q., 2009, Radiocarbon: A chronological tool for the recent past: Quaternary  
314 Geochronology, v. 4, p. 378–390, doi:10.1016/j.quageo.2009.03.006.
- 315 Hua, Q., Levchenko, V.A., and Kosnik, M.A., 2019, Direct AMS <sup>14</sup> C Analysis of Carbonate:  
316 Radiocarbon, v. 61, p. 1431–1440, doi:10.1017/RDC.2019.24.
- 317 Kowalewski, M., Casebolt, S., Hua, Q., Whitacre, K.E., Kaufman, D.S., and Kosnik, M.A.,  
318 2018, One fossil record, multiple time resolutions: Disparate time-averaging of echinoids

319 and mollusks on a Holocene carbonate platform: *Geology*, v. 46, p. 51–54,  
320 doi:10.1130/G39789.1.

321 Radabaugh, K.R., Moyer, R.P., and Geiger, S.P. (Eds.), 2019, Oyster Integrated Mapping and  
322 Monitoring Program Report for the State of Florida: St. Petersburg, Florida, Fish and  
323 Wildlife Research Institute, Florida Fish and Wildlife Conservation Commission, FWRI  
324 Technical Report 22, 175 p.

325 Powell, E.N., Klinck, J.M., Ashton-Alcox, K., Hofmann, E.E., and Morson, J., 2012, The rise  
326 and fall of *Crassostrea virginica* oyster reefs: the role of disease and fishing in their  
327 demise and a vignette on their management: *Journal of Marine Research*, v. 70, p. 505–  
328 558, doi:10.1357/002224012802851878.

329 R Core Team, 2021, R: A Language and Environment for Statistical Computing: Vienna,  
330 Austria, R Foundation for Statistical Computing, <https://www.R-project.org>.

331 Reimer, P.J. et al., 2013, IntCal13 and Marine13 radiocarbon age calibration curves 0–50,000  
332 years cal BP: *Radiocarbon*, v. 55, p. 1869–1887, doi:10.2458/azu\_js\_rc.55.16947.

333 Rodriguez, A.B. et al., 2014, Oyster reefs can outpace sea-level rise: *Nature Climate Change*, v.  
334 4, p. 493–497, doi:<http://dx.doi.org.proxy.library.cornell.edu/10.1038/nclimate2216>.

335 Spennemann, D.H.R., and Head, M.J., 1998, Tongan pottery chronology, <sup>14</sup>C dates and the  
336 hardwater effect: *Quaternary Science Reviews*, v. 17, p. 1047-1056, doi:10.1016/S0277-  
337 3791(97)00100-5.

338 Ulm, S., Petchey, F., and Ross, A., 2009, Marine reservoir corrections for Moreton Bay,  
339 Australia: *Archaeology in Oceania*, v. 44, p. 160-166, doi:10.1002/j.1834-  
340 4453.2009.tb00060.x.  
341
